# Supplementary material for: Involvement of halogen and polyaromatic substituents in chalcone derivatives as dye sensitizers in solar cell applications
Source: Royal Society of Chemistry journal article supplement (doi:10.1039/d2nj05937a), 2023-01-01
Supplement: d2nj05937a1.pdf [file d2nj05937a1.pdf]

## Electronic Supplementary Information

# Involvement of Halogen and Polyaromatic Substituents in Chalcone Derivatives as Dye-Sensitizer in Solar Cell Application

Siti Nabilla Aliya Mohd Nizar, Mohd Mustaqim Rosli, Siti Azrah Mohamad Samsuri,  
Ibrahim Abdul Razak, Suhana Arshad

New Journal of Chemistry

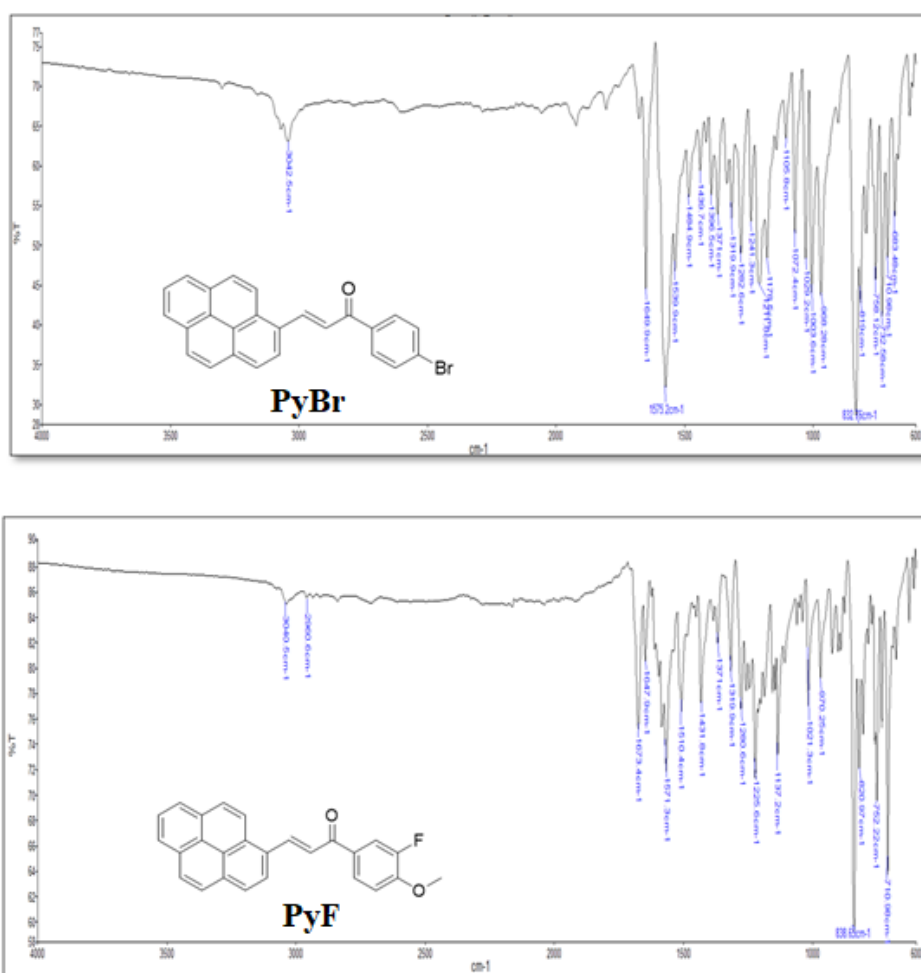

Figure S1. The FTIR spectrum of PyBr and PyF.

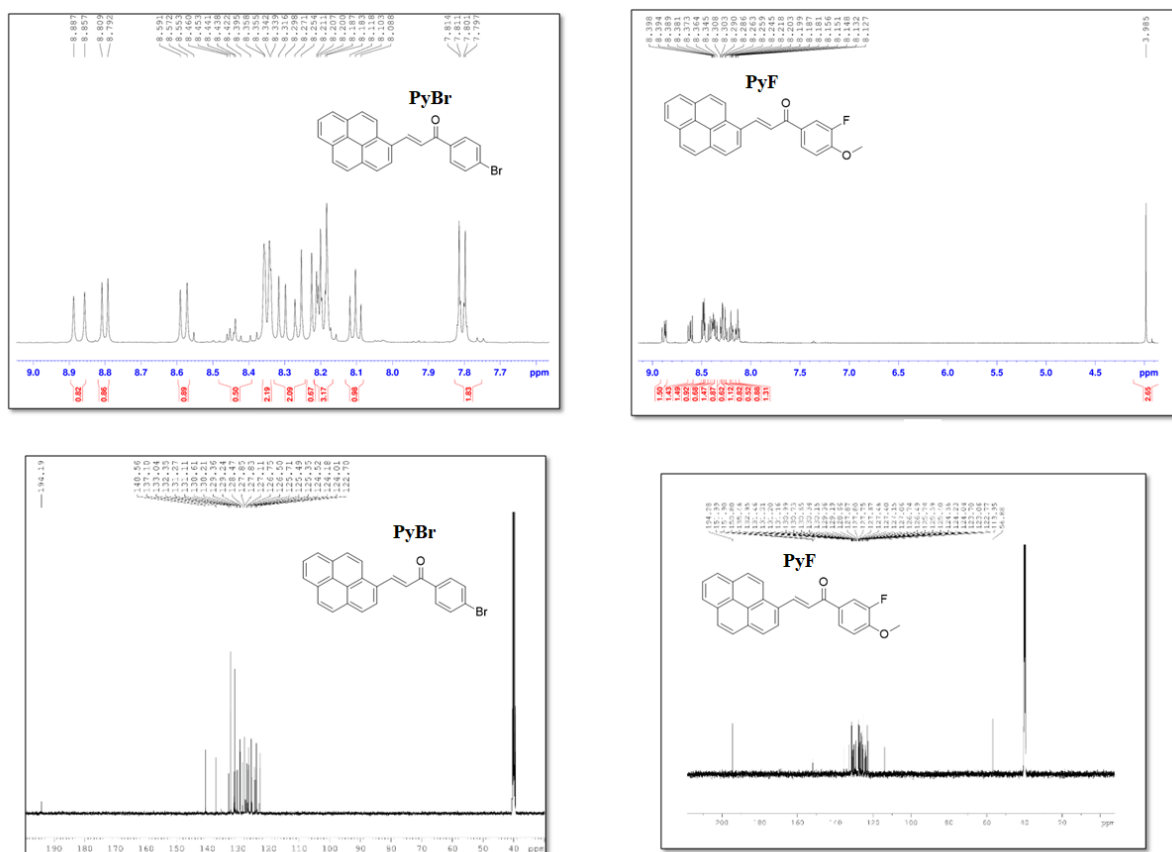

**Figure S2.**  $^1\text{H}$  and  $^{13}\text{C}$  NMR spectra of **PyBr** and **PyF**.

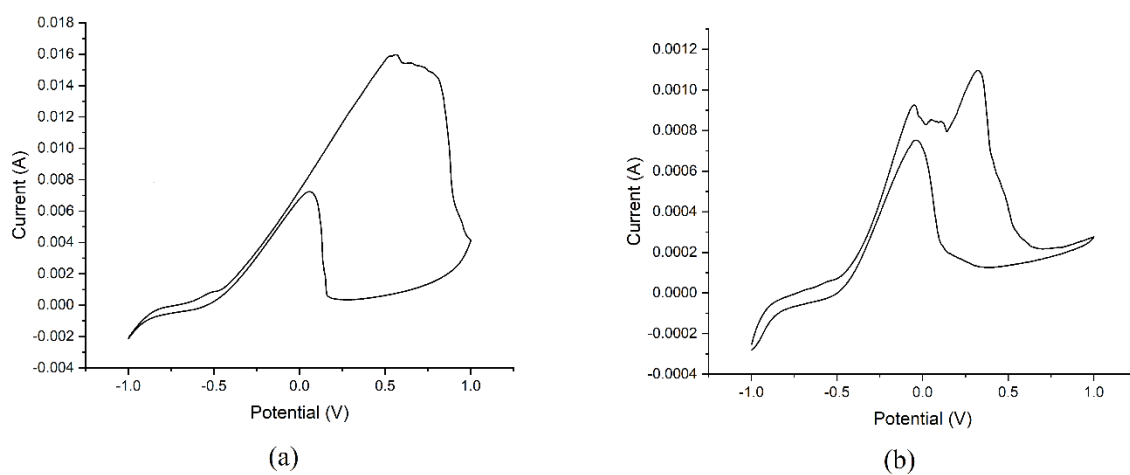

**Figure S3.** Cyclic voltammogram of **PyBr** and **PyF**.
